# Supplementary material
Source: PubMed Central journal article supplement (PMC6075714)
Supplement: NIHMS954087-supplement-Supp_Figure_1_2.pdf [file NIHMS954087-supplement-Supp_Figure_1_2.pdf]

Appendix  
Annual Total Binge Drinks Consumed by U.S. Adults, 2015  
Kanny et al.

Appendix Figure 1. Total annual binge drinks per adult<sup>a</sup> aged  $\geq 18$  years by state, U.S., 2015.

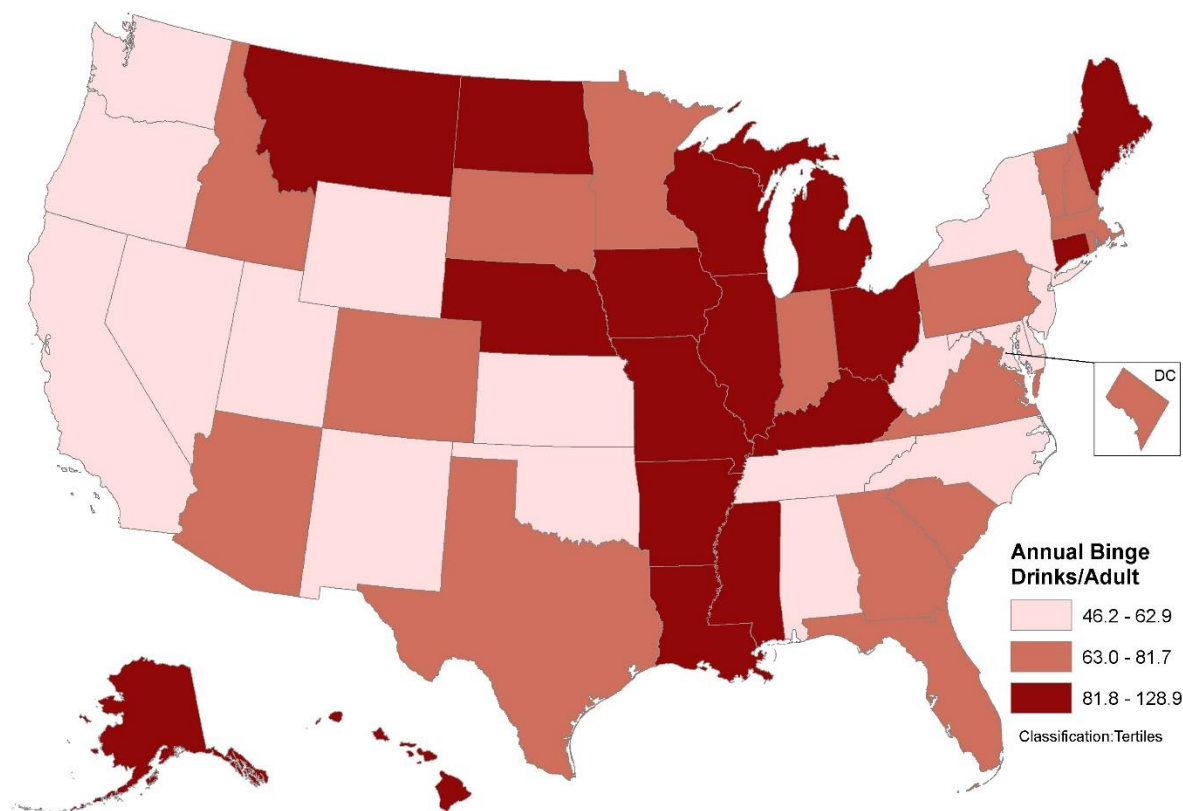

<sup>a</sup>Calculated by dividing the state-specific summation of total annual binge drinks by the estimated number of adults in each state. Total annual binge drinks was calculated as the number of annual binge drinking episodes multiplied by binge drinking intensity (i.e., the average largest number of drinks consumed on any occasion in the past 30 days for each binge drinker).

Appendix  
Annual Total Binge Drinks Consumed by U.S. Adults, 2015  
Kanny et al.

Appendix Figure 2. Age-adjusted<sup>a</sup> binge drinking prevalence<sup>b</sup> among adults aged  $\geq 18$  years by state, U.S., 2015.

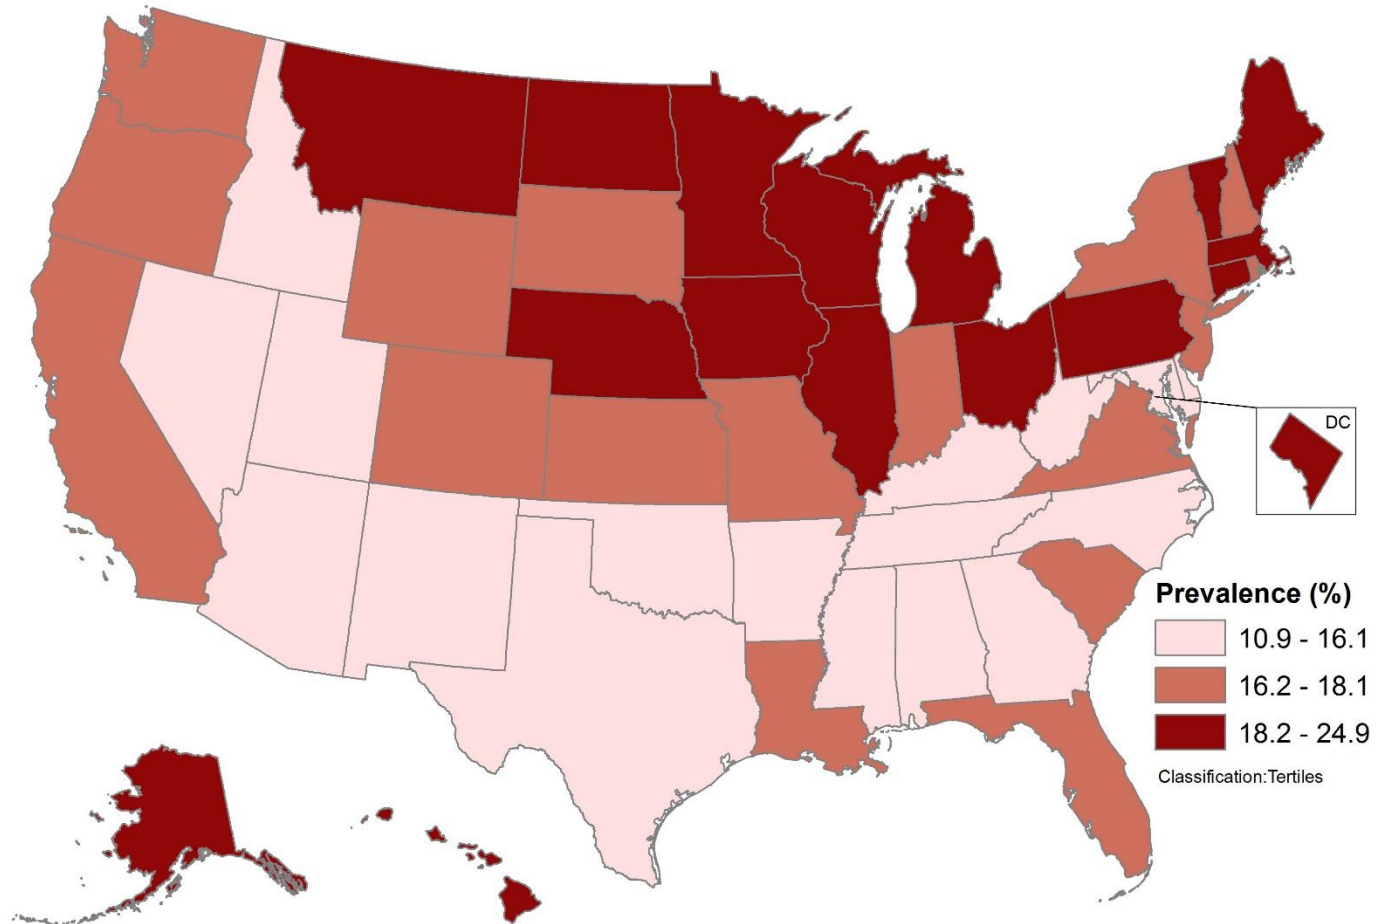

<sup>a</sup>Age-adjusted to 2000 projected U.S. population (distribution #9 from Klein RJ & Schoenborn CA, 2001).

<sup>b</sup>Total number of adults who reported at least one binge drinking episode during the past 30 days divided by the total number of adults.
